# Supplementary material for: Amikacin Suppresses Human Breast Cancer Cell MDA-MB-231 Migration and Invasion
Source: MDPI journal article supplement (doi:10.3390/toxics8040108), 2020-11-20
Supplement: s1 [file s1]

# Supplementary Materials: Amikacin Suppresses Human Breast Cancer Cell MDA-MB-231 Migration and Invasion

Yun-Hsin Wang, Yau-Hung Chen and Wen-Hao Shen

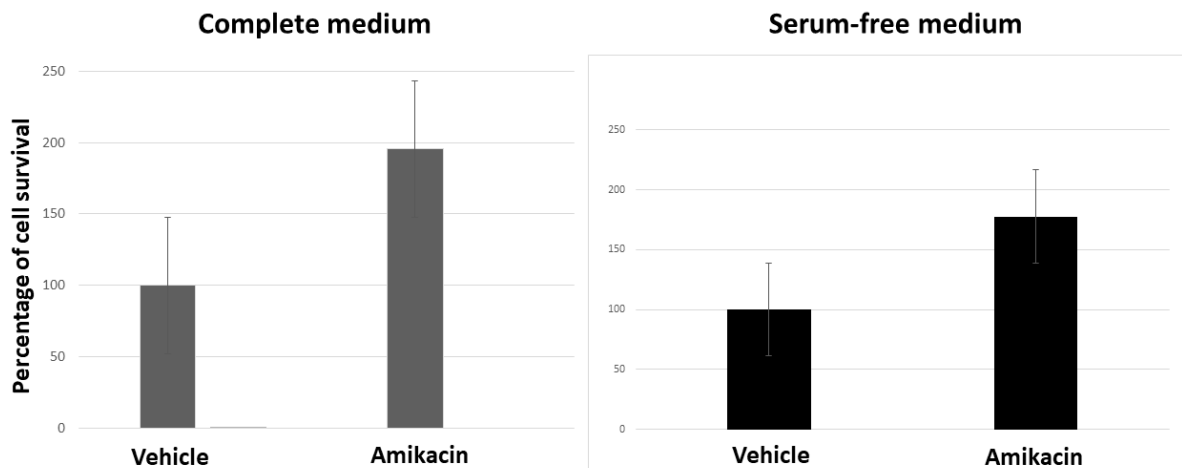

**Figure S1.** The cell survival rates were calculated with or without amikacin treatment by MTT assay. All data were collected from three independent experiments and statistically analyzed by Excel software (averages  $\pm$  SD; \*  $p < 0.05$ ).

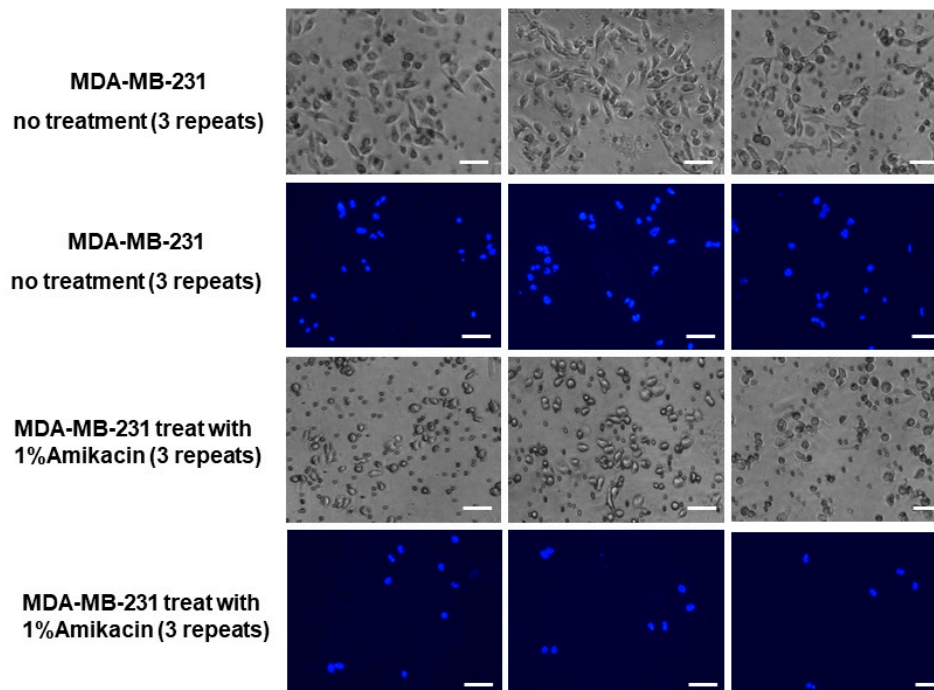

**Figure S2.** The cell morphology in the upperwell after amikacin treatment by transwell migration assay. Photos were taken from three independent experiments (with or without 1% amikacin treatment). Scale bar: 25  $\mu$ m.
